# Supplementary material for: A high thermal stability Cr3+-doped gallate far red phosphor for plant lighting: structure, luminescence enhancement and application prospect
Source: Royal Society of Chemistry journal article supplement (doi:10.1039/d2tc00614f), 2022-01-01
Supplement: d2tc00614f1.pdf [file d2tc00614f1.pdf]

## Electronic Supporting Information

### **A high thermal stability Cr<sup>3+</sup>-doped gallate far red phosphor for plant lighting: structure, luminescence enhancement and application prospect**

Cheng Zhou,<sup>†a,b</sup> Lu Peng,<sup>†a,b</sup> Zihui Kong,<sup>a,b</sup> Meihan Wu,<sup>a</sup> Maxim S. Molokeev,<sup>a,d</sup> Jing Wang <sup>\*,a,b,c</sup> and Mao Xia<sup>\*,a,b</sup>

a.School of Chemistry and Materials Science, Hunan Agricultural University, Changsha 410128, PR China. E-mail: xiamao2019@hunau.edu.cn.

b.Hunan Optical Agriculture Engineering Technology Research Center, Changsha 410128, PR China.

c.State Key Laboratory of Optoelectronic Materials and Technologies, School of Chemistry, Sun Yat-Sen University, Guangzhou 510275, PR China. E-mail: ceswj@mail.sysu.edu.cn.

d.Siberian Federal University, Krasnoyarsk, 660041, Russia.

#### **\*Corresponding authors:**

Prof. Jing Wang

**E-mail:** [ceswj@mail.sysu.edu.cn](mailto:ceswj@mail.sysu.edu.cn)

Prof. Mao Xia

**E-mail:** [xiamao2019@hunau.edu.cn](mailto:xiamao2019@hunau.edu.cn)

<sup>†</sup>These authors contributed equally to this work.

**Table S1.** The morphological indicators of tomato plants

| Field planting | 1-1            | 1-2            | 1-3   | 1-4   | 1-5   | Average<br>(cm-1) |       |       |
|----------------|----------------|----------------|-------|-------|-------|-------------------|-------|-------|
| CK             | Plant height   | 13.30          | 8.80  | 8.20  | 6.30  | 12.90             | 9.90  |       |
|                | Stem thickness | 0.60           | 0.62  | 0.68  | 0.52  | 0.75              | 0.64  |       |
|                | Leaf length    | 3.80           | 3.10  | 4.20  | 2.90  | 4.80              | 3.76  |       |
|                | Leaf width     | 2.30           | 2.60  | 2.10  | 2.00  | 3.60              | 2.52  |       |
| T <sub>1</sub> | Plant height   | 10.00          | 7.40  | 6.10  | 8.30  | 7.20              | 7.80  |       |
|                | Stem thickness | 0.59           | 0.58  | 0.61  | 0.47  | 0.56              | 0.56  |       |
|                | Leaf length    | 3.90           | 4.70  | 3.20  | 3.80  | 3.10              | 3.74  |       |
| Mature         | Leaf width     | 3.20           | 2.50  | 2.90  | 2.70  | 2.80              | 2.82  |       |
|                | CK             | Plant height   | 59.70 | 32.20 | 43.30 | 35.30             | 29.60 | 40.02 |
|                |                | Stem thickness | 0.77  | 0.76  | 0.82  | 0.78              | 0.89  | 0.80  |
| Leaf length    |                | 5.60           | 4.70  | 6.00  | 4.30  | 5.20              | 5.16  |       |
| Leaf width     |                | 3.80           | 3.20  | 3.90  | 3.00  | 3.30              | 3.44  |       |
| T <sub>1</sub> | Plant height   | 16.60          | 24.30 | 29.10 | 23.90 | 37.20             | 26.22 |       |
|                | Stem thickness | 0.70           | 0.48  | 0.60  | 0.59  | 0.65              | 0.60  |       |
|                | Leaf length    | 4.20           | 3.90  | 4.70  | 5.00  | 5.50              | 4.66  |       |
| Leaf width     | 3.60           | 3.20           | 4.00  | 3.20  | 2.50  | 3.30              |       |       |

**Table S2.** The leaf pigments and fruit quality of tomato plants

| Mature         | Chl a<br>(mg/g) | Chl b<br>(mg/g) | Carotenoids<br>(mg/g) | Lycopene<br>( $\mu$ g/g) | Soluble<br>sugar (%) |
|----------------|-----------------|-----------------|-----------------------|--------------------------|----------------------|
|                | 3.07            | 0.95            | 0.65                  | 0.19                     | 115.83               |
| CK             | 3.02            | 0.93            | 0.64                  | 0.12                     | 90.77                |
|                | 3.09            | 0.94            | 0.64                  | 0.24                     | 113.28               |
| Average        | 3.06            | 0.94            | 0.64                  | 0.18                     | 106.63               |
|                | 1.43            | 0.47            | 0.32                  | 0.40                     | 196.54               |
| T <sub>1</sub> | 1.13            | 0.38            | 0.26                  | 0.41                     | 102.71               |
|                | 1.34            | 0.44            | 0.31                  | 0.39                     | 106.64               |
| Average        | 1.30            | 0.43            | 0.30                  | 0.40                     | 135.30               |

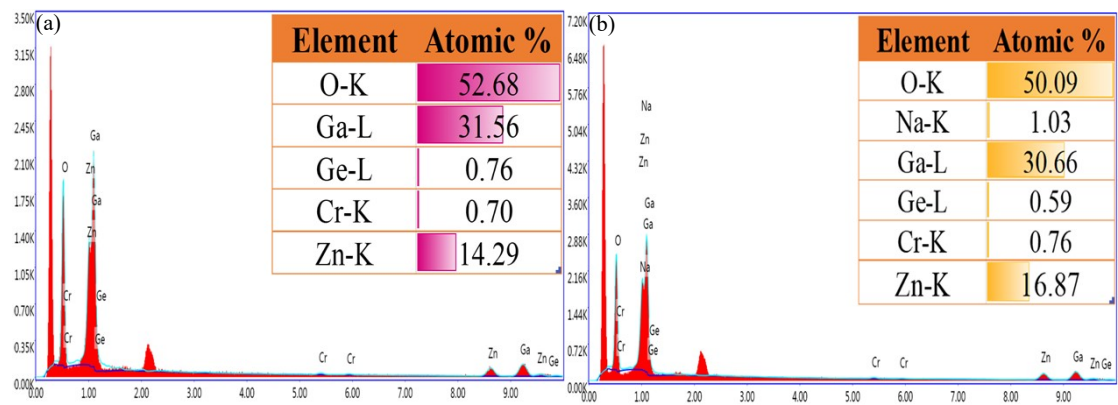

**Fig.S1.** EDS spectra of ZGO:0.02Cr<sup>3+</sup>,0.03Ge<sup>4+</sup>,0.11Li<sup>+</sup> and ZGO:0.02Cr<sup>3+</sup>,0.03Ge<sup>4+</sup>,0.03Na<sup>+</sup>, the inset shows the proportion of the elements.

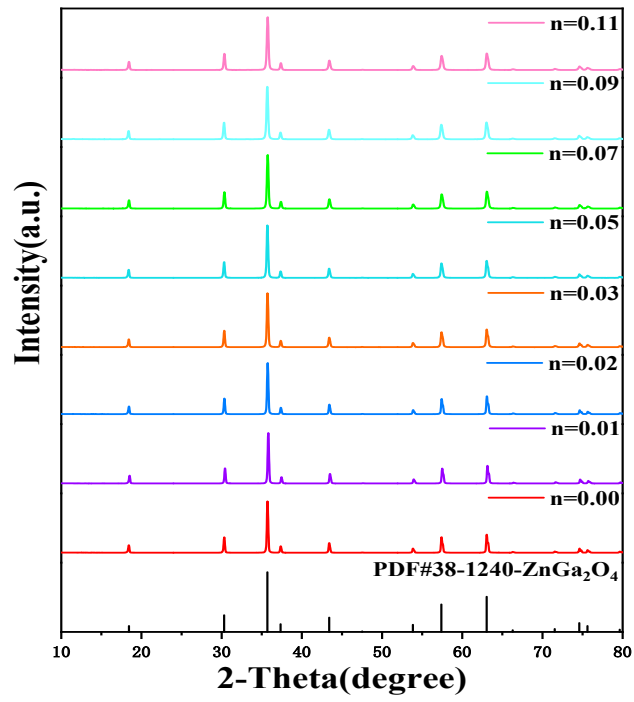

**Fig.S2.** XRD pattern of excess Na<sup>+</sup> doped ZGO:0.02Cr<sup>3+</sup>,0.03Ge<sup>4+</sup>,nNa<sup>+</sup>.

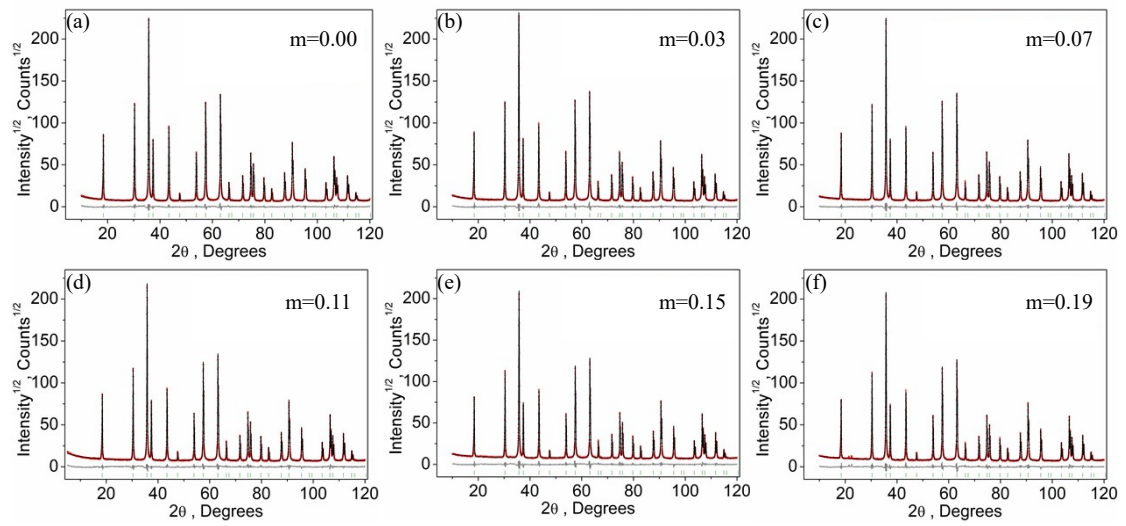

**Fig.S3.** a-f: Rietveld refinement of ZGO:0.02Cr<sup>3+</sup>,0.03Ge<sup>4+</sup>,mLi<sup>+</sup>.

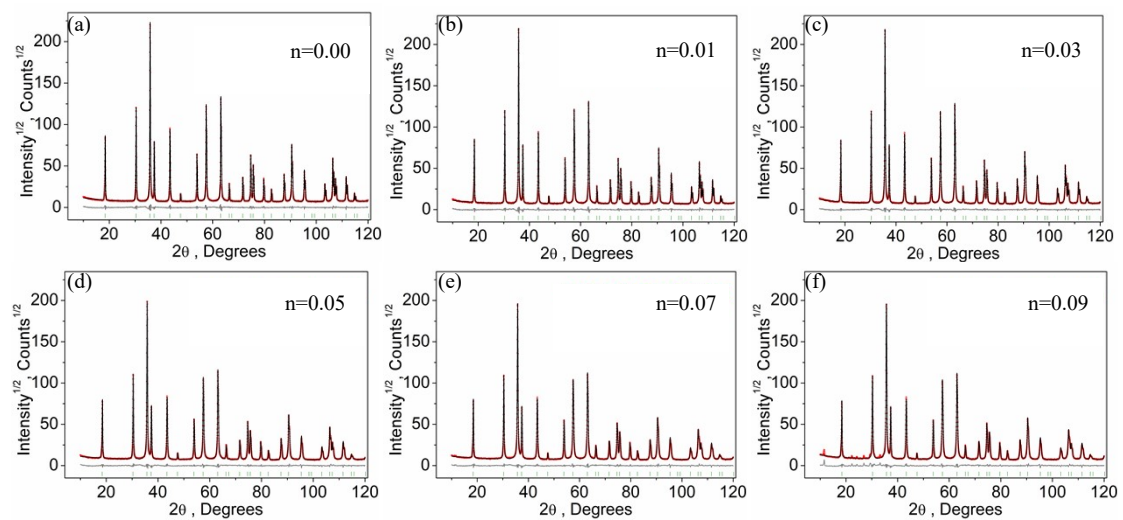

**Fig.S4.** a-f: Rietveld refinement of ZGO:0.02Cr<sup>3+</sup>,0.03Ge<sup>4+</sup>,nNa<sup>+</sup>.

**Table S3.** Main parameters of processing and refinement of the ZGO:0.02Cr<sup>3+</sup>,0.03Ge<sup>4+</sup>,mLi<sup>+</sup> and ZGO:0.02Cr<sup>3+</sup>,0.03Ge<sup>4+</sup>,nNa<sup>+</sup> samples

| $m, n$ | Dopant | Space Group  | Cell parameters (Å ),<br>Cell Volume (Å <sup>3</sup> ) | $R_{wp}, R_p, R_B$ (%), $\chi^2$ |
|--------|--------|--------------|--------------------------------------------------------|----------------------------------|
| m=0    | Li     | <i>Fd-3m</i> | $a = 8.33458$ (4),<br>$V = 578.864$ (8)                | 5.66, 3.87, 1.04,<br>1.14        |
| m=0.03 | Li     | <i>Fd-3m</i> | $a = 8.33178$ (8),<br>$V = 578.379$ (16)               | 6.16, 4.41, 1.56,<br>1.25        |
| m=0.07 | Li     | <i>Fd-3m</i> | $a = 8.32911$ (4),<br>$V = 577.525$ (8)                | 6.57, 4.74, 1.26,<br>1.30        |
| m=0.11 | Li     | <i>Fd-3m</i> | $a = 8.32628$ (3),<br>$V = 577.235$ (7)                | 6.60, 4.71, 1.18,<br>1.25        |
| m=0.15 | Li     | <i>Fd-3m</i> | $a = 8.32317$ (4),<br>$V = 576.589$ (9)                | 7.21, 5.42, 2.07,<br>1.34        |
| m=0.19 | Li     | <i>Fd-3m</i> | $a = 8.32036$ (11),<br>$V = 576.00$ (2)                | 7.63, 5.72, 2.45,<br>1.43        |
| n=0    | Na     | <i>Fd-3m</i> | $a = 8.33320$ (8),<br>$V = 578.675$ (17)               | 5.47, 3.84, 0.96,<br>1.09        |
| n=0.01 | Na     | <i>Fd-3m</i> | $a = 8.33301$ (6),<br>$V = 578.636$ (12)               | 5.52, 3.84, 0.94,<br>1.09        |
| n=0.03 | Na     | <i>Fd-3m</i> | $a = 8.33347$ (4),<br>$V = 578.733$ (8)                | 5.09, 3.54, 1.04,<br>1.03        |
| n=0.05 | Na     | <i>Fd-3m</i> | $a = 8.33445$ (6),<br>$V = 578.935$ (12)               | 5.15, 3.68, 0.99,<br>1.01        |
| n=0.07 | Na     | <i>Fd-3m</i> | $a = 8.33564$ (16),<br>$V = 579.19$ (3)                | 5.18, 3.62, 0.96,<br>1.03        |
| n=0.09 | Na     | <i>Fd-3m</i> | $a = 8.33692$ (8),<br>$V = 579.451$ (17)               | 6.60, 4.17, 1.17,<br>1.33        |



## Crystal field and nephelauxetic effect

The crystal field and nephelauxetic effect are calculated by below formula. Three relevant parameters are evaluated: the crystal field parameter ( $Dq$ ), the Racah parameters ( $B$ ) and ( $C$ ). According to the PLE and PL spectrum data, the values of  $Dq$ ,  $B$  and  $C$  can be calculated by the following equations <sup>1,2</sup>:

$$Dq = \frac{E(^4T_2 - ^4A_2)}{10} \quad (1)$$

$$\frac{Dq}{B} = \frac{15(x - 8)}{(x^2 - 10x)} \quad (2)$$

$$x = \frac{E(^4A_2 - ^4T_1) - E(^4A_2 - ^4T_2)}{Dq} \quad (3)$$

$$\frac{E(^2E_g - ^4A_2)}{B} = \frac{3.05C}{B} + 7.9 - \frac{1.8B}{Dq} \quad (4)$$

the  $\beta_1$  nephelauxetic effect to comprehensively consider, the formula is as follow:

$$\beta_1 = \sqrt{\left(\frac{B}{B_0}\right)^2 + \left(\frac{C}{C_0}\right)^2} \quad (5)$$

where  $B_0$  and  $C_0$  are the Racah parameters for free ions, and the values of them are  $B_0=995\text{cm}^{-1}$  and  $C_0=3637\text{cm}^{-1}$  for  $\text{Cr}^{3+}$ , respectively <sup>3,4</sup>.

**Table S4.** The calculated of crystal field strength and Racah parameters  $B$ ,  $C$  and  $\theta_1$ 

| Samples                                                             | $E(^4T_1)$<br>( $\text{cm}^{-1}$ ) | $E(^4T_2)$<br>( $\text{cm}^{-1}$ ) | $E(^2E)$<br>( $\text{cm}^{-1}$ ) | $Dq$ | $B$ | $C$  | $X$  | $Dq/B$ | $\theta_1$ |
|---------------------------------------------------------------------|------------------------------------|------------------------------------|----------------------------------|------|-----|------|------|--------|------------|
| ZGO:Cr <sup>3+</sup>                                                | 24264                              | 18235                              | 14065                            | 1824 | 573 | 3233 | 3.31 | 3.18   | 1.06       |
| ZGO:Cr <sup>3+</sup> ,0.03Ge <sup>4+</sup> ,<br>0.03Li <sup>+</sup> | 24332                              | 18257                              | 14061                            | 1826 | 578 | 3220 | 3.33 | 3.16   | 1.06       |
| ZGO:Cr <sup>3+</sup> ,0.03Ge <sup>4+</sup> ,<br>0.03Na <sup>+</sup> | 24305                              | 18298                              | 14065                            | 1830 | 570 | 3239 | 3.28 | 3.21   | 1.06       |
| ZGO:Cr <sup>3+</sup> ,0.03Ge <sup>4+</sup> ,<br>0.11Li <sup>+</sup> | 24290                              | 18224                              | 14053                            | 1822 | 578 | 3220 | 3.33 | 3.16   | 1.06       |

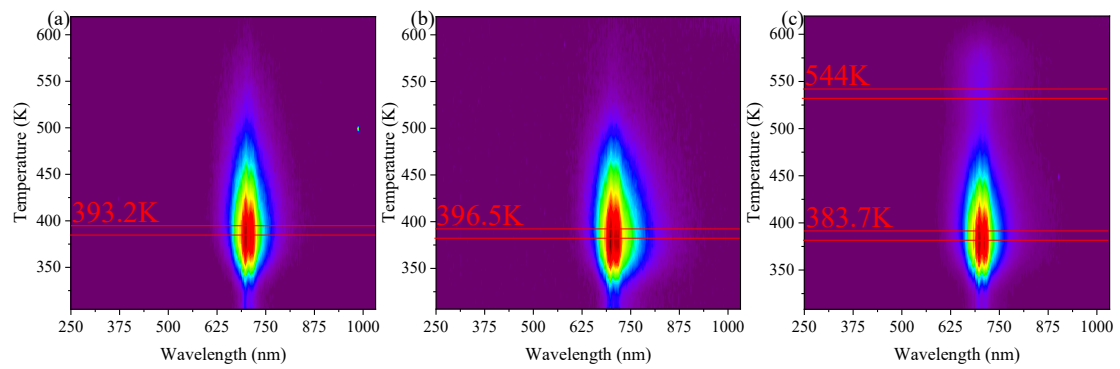

**Fig.S5.** a-c Wavelength-resolved TL spectra of ZGO:0.02Cr<sup>3+</sup>, ZGO:0.02Cr<sup>3+</sup>,0.03Ge<sup>4+</sup>,0.03Li<sup>+</sup>, ZGO:0.02Cr<sup>3+</sup>,0.03Ge<sup>4+</sup>,0.03Na<sup>+</sup> charged for 1 min.

## Notes and references

- 1 S.M. Gu, M. Xia and Z. Zhou, *Chem. Eng. J.*, 2020, 396, 125208-125216.
- 2 S.J. Gai, H.F. Zhu and M. Xia, *Ceram. Int.*, 2020, 46, 20173-20182.
- 3 Brik MG and Srivastava AM., *Opt Mater*, 2013, 35, 1251-1256.
- 4 Uylings P.H.M., Raassen A.J.J. and Wyart J.F., *J Phys B: At Mol Phys* 1984, 17, 4103-4126.
